# Supplementary material for: Obesity, Inflammation, and Mortality in COVID-19: An Observational Study from the Public Health Care System of New York City
Source: MDPI journal article supplement (doi:10.3390/jcm11030622), 2022-01-26
Supplement: s1 [file s1]

**Table S1.** Inflammatory markers stratified per BMI group, sex, age group, and survival status

| Marker /<br>Characteristic | All Patients |                      |               |                       |               |                        |               |                         |             |                      |             |                      |
|----------------------------|--------------|----------------------|---------------|-----------------------|---------------|------------------------|---------------|-------------------------|-------------|----------------------|-------------|----------------------|
|                            | BMI group    |                      |               |                       |               |                        |               |                         |             |                      |             |                      |
|                            | BMI < 25     |                      | 25 ≤ BMI < 30 |                       | 30 ≤ BMI < 35 |                        | 35 ≤ BMI < 40 |                         | BMI ≥ 40    |                      |             |                      |
|                            | No. (%)      | Median (IQR)         | No. (%)       | Median (IQR)          | No. (%)       | Median (IQR)           | No. (%)       | Median (IQR)            | No. (%)     | Median (IQR)         | No. (%)     | Median (IQR)         |
| <b>LDH - U/L</b>           | 6476         | 432.0 (310.0-611.0)  | 1822 (28.13)  | 410.5 (289.0-580.0)   | 2176 (33.6)   | 434.0 (316.5-612.5)    | 1313 (20.27)  | 434.0 (317.0-615.0)     | 648 (10.01) | 465.0 (331.0-666.0)  | 517 (7.98)  | 446.0 (334.0-626.0)  |
| <b>Male</b>                | 3997 (61.72) | 446 (322-628)        | 1220 (66.96)  | 418.0 (291.0-598.5)   | 1457 (66.96)  | 444.0 (324.0-624.0)    | 757 (57.65)   | 460.0 (339.0-655.0)     | 318 (49.07) | 509.5 (357.0-693.0)  | 245 (47.39) | 466.0 (347.0-672.0)  |
| <b>Female</b>              | 2479 (38.28) | 411 (296-580)        | 602 (33.04)   | 398.0 (283.0-558.0)   | 719 (33.04)   | 419.0 (296.0-580.0)    | 556 (42.35)   | 396.0 (296.5-572.5)     | 330 (50.93) | 434.0 (306.0-629.0)  | 272 (52.61) | 434.5 (317.0-605.5)  |
| <b>Age &lt; 65</b>         | 3492 (53.92) | 417 (302-595)        | 736 (40.4)    | 385.0 (274.5-560.5)   | 1161 (53.35)  | 418.0 (300.0-592.0)    | 807 (61.46)   | 419.0 (302.0-592.0)     | 419 (64.66) | 456.0 (325.0-629.0)  | 369 (71.37) | 435.0 (330.0-635.0)  |
| <b>Age ≥ 65</b>            | 2984 (46.08) | 448 (324-626)        | 1086 (59.6)   | 434.5 (296.0-602.0)   | 1015 (46.65)  | 457.0 (331.0-631.0)    | 506 (38.54)   | 457.0 (347.0-647.0)     | 229 (35.34) | 494.0 (341.0-693.0)  | 148 (28.63) | 463.5 (340.5-615.5)  |
| <b>Survived</b>            | 4615 (71.26) | 387 (284-530)        | 1330 (73)     | 371.0 (265-509)       | 1560 (71.69)  | 393.0 (287.0-532.5)    | 952 (72.51)   | 390.0 (295.0-543.0)     | 442 (68.21) | 405.5 (301.0-573.0)  | 331 (64.02) | 391.0 (297.0-543.0)  |
| <b>Died</b>                | 1861 (28.74) | 572 (427-794)        | 492 (27)      | 553.0 (396-763)       | 616 (28.31)   | 582.0 (440.0-792.0)    | 361 (27.49)   | 587.0 (426.0-843.0)     | 206 (31.79) | 613.5 (464.0-801.0)  | 186 (35.98) | 551.0 (426.0-788.0)  |
| <b>Ferritin - ng/mL</b>    | 6285         | 740.0 (337.0-1447.0) | 1790 (28.48)  | 744.8 (337.5-1549.0)  | 2085 (33.17)  | 835.2 (395.0-1544.0)   | 1269 (20.19)  | 668.0 (308.0-1366.1)    | 638 (10.15) | 659.0 (318.0-1267.6) | 503 (8)     | 574.0 (253.0-1157.0) |
| <b>Male</b>                | 3891 (61.91) | 906 (462-1656)       | 1193 (66.65)  | 862.0 (413.1-1688.0)  | 1403 (67.29)  | 955.0 (517.7-718.0)    | 740 (58.31)   | 911.95 (486.55-1742.35) | 313 (49.06) | 886.0 (452.5-1514.0) | 242 (48.11) | 793.5 (383.0-1483.0) |
| <b>Female</b>              | 2394 (38.09) | 492 (219-1013)       | 597 (33.35)   | 518.2 (235.0-1141.0)  | 682 (32.71)   | 542.5 (236.0-1193.0)   | 529 (41.69)   | 463.0 (180.6-847.0)     | 325 (50.94) | 528.1 (263.0-935.1)  | 261 (51.89) | 429.0 (169.0-821.5)  |
| <b>Age &lt; 65</b>         | 3358 (53.43) | 746 (307-1424)       | 723 (40.39)   | 738.0 (287.0-1553.0)  | 1100 (52.76)  | 869.5 (382.25-1575.00) | 756 (59.57)   | 692.0 (278.0-1436.05)   | 427 (66.93) | 674.0 (314.0-1267.6) | 352 (69.98) | 541.0 (201.5-1051.5) |
| <b>Age ≥ 65</b>            | 2927 (46.57) | 736 (369-1466)       | 1067 (59.61)  | 759.5 (361.0-1544.0)  | 985 (47.24)   | 796.0 (412.0-1515.0)   | 513 (40.43)   | 636.0 (353.0-1268.0)    | 211 (33.07) | 650.3 (321.0-1269.0) | 151 (30.02) | 612.8 (321.0-1245.0) |
| <b>Survived</b>            | 4508 (71.73) | 625 (282-1241)       | 1318 (73.63)  | 647.0 (291.0-1287.0)  | 1500 (71.94)  | 746.95 (336.5-1349.55) | 914 (72.03)   | 569.0 (249.0-1169.0)    | 447 (70.06) | 572.0 (272.0-1106.0) | 329 (65.41) | 431.0 (179.3-896.0)  |
| <b>Died</b>                | 1777 (28.27) | 1043 (558-1952)      | 472 (26.37)   | 1063.5 (531.6-2000.0) | 585 (28.06)   | 1112.2 (654.0-2000.0)  | 355 (27.97)   | 1090.8 (542.0-1951.0)   | 191 (29.94) | 875.9 (515.0-1532.0) | 174 (34.59) | 833.5 (479.0-1527.0) |
| <b>CRP - mg/dL</b>         | 3114         | 24.22 (8.40-92.80)   | 897 (28.81)   | 19.57 (6.56-86.10)    | 997 (32.02)   | 26.82 (10.09-111.81)   | 614 (19.72)   | 23.01 (8.61-97.15)      | 327 (10.5)  | 28.44 (8.50-95.10)   | 279 (8.96)  | 22.99 (9.51-69.10)   |
| <b>Male</b>                | 1940 (62.3)  | 26.85 (9.76-105.84)  | 613 (68.34)   | 21.44 (7.42-91.96)    | 667 (66.9)    | 28.73 (11.79-118.60)   | 361 (58.79)   | 27.09 (9.81-19.30)      | 173 (52.91) | 31.18 (11.15-93.60)  | 126 (45.16) | 26.07 (9.90-84.02)   |
| <b>Female</b>              | 1174 (37.7)  | 19.52 (6.97-76.60)   | 284 (31.66)   | 15.13 (4.95-61.70)    | 330 (33.1)    | 20.17 (6.97-90.10)     | 253 (41.21)   | 18.67 (6.97-73.60)      | 154 (47.09) | 25.44 (7.96-95.60)   | 153 (54.84) | 22.05 (8.98-61.00)   |
| <b>Age &lt; 65</b>         | 1757 (56.42) | 25.30 (8.01-93.40)   | 407 (45.37)   | 21.00 (5.64-90.80)    | 553 (55.47)   | 27.62 (9.40-106.90)    | 389 (63.36)   | 24.97 (8.06-111.64)     | 216 (66.06) | 28.70 (3.14-92.55)   | 192 (68.82) | 22.10 (8.54-63.20)   |
| <b>Age ≥ 65</b>            | 1357 (43.58) | 22.64 (8.98-91.70)   | 490 (54.63)   | 19.13 (6.90-84.40)    | 444 (44.53)   | 25.70 (10.72-118.75)   | 225 (36.64)   | 20.83 (9.71-81.00)      | 111 (33.94) | 25.64 (8.88-96.30)   | 87 (31.18)  | 25.15 (11.87-80.90)  |
| <b>Survived</b>            | 2294 (73.67) | 20.81 (6.92-83.60)   | 679 (75.7)    | 15.80 (5.28-69.59)    | 748 (75.03)   | 24.14 (8.06-98.69)     | 451 (73.45)   | 19.51 (7.19-82.33)      | 229 (70.03) | 27.02 (6.91-101.26)  | 187 (67.03) | 21.56 (8.34-64.90)   |
| <b>Died</b>                | 820 (26.33)  | 29.70 (14.20-141.20) | 218 (24.3)    | 30.01 (11.97-148.00)  | 249 (24.97)   | 31.80 (18.29-151.70)   | 163 (26.55)   | 28.88 (15.17-156.90)    | 98 (29.97)  | 29.48 (14.28-62.80)  | 92 (32.97)  | 25.42 (11.24-88.11)  |

|                            |                 |                             |                 |                             |                 |                          |                 |                          |                |                          |                |                             |
|----------------------------|-----------------|-----------------------------|-----------------|-----------------------------|-----------------|--------------------------|-----------------|--------------------------|----------------|--------------------------|----------------|-----------------------------|
| <b>IL-6 -<br/>pg/mL</b>    | 2237            | 82.10<br>(35.50-<br>174.30) | 596<br>(26.64)  | 77.45<br>(33.55-<br>175.15) | 720<br>(32.19)  | 91.25 (39.60-<br>191.25) | 472<br>(21.1)   | 76.50 (34.55-<br>156.85) | 248<br>(11.09) | 80.20 (36.30-<br>188.15) | 201 (8.99)     | 85.10<br>(32.30-<br>164.00) |
| <b>Male</b>                | 1420<br>(63.48) | 90.4 (39.9-<br>193.7)       | 408<br>(68.46)  | 80.1 (36.1-<br>191.1)       | 497<br>(69.03)  | 101.1 (44.6-<br>207.1)   | 291<br>(61.65)  | 80.6 (39.8-<br>177.6)    | 120<br>(48.39) | 99.0 (38.0-<br>215.4)    | 104<br>(51.74) | 87.0 (35.2-<br>171.6)       |
| <b>Female</b>              | 817<br>(36.52)  | 71.0 (29.0-<br>155.3)       | 188<br>(31.54)  | 72.1 (26.5-<br>150.2)       | 223<br>(30.97)  | 69.5 (31.6-<br>162.0)    | 181<br>(38.35)  | 72.4 (26.5-<br>127.2)    | 128<br>(51.61) | 64.0 (31.7-<br>170.4)    | 97 (48.26)     | 81.1 (29.0-<br>158.6)       |
| <b>Age &lt; 65</b>         | 1212<br>(54.18) | 77.2 (32.2-<br>168.0)       | 235<br>(39.43)  | 68.5 (30.4-<br>173.7)       | 386<br>(53.61)  | 86.2 (36.9-<br>175.2)    | 280<br>(59.32)  | 68.3 (30.6-<br>148.5)    | 163<br>(65.73) | 80.4 (34.9-<br>187.4)    | 148<br>(73.63) | 66.3 (27.5-<br>148.3)       |
| <b>Age ≥ 65</b>            | 1025<br>(45.82) | 91.0 (39.4-<br>189.4)       | 361<br>(60.57)  | 84.0 (36.0-<br>177.6)       | 334<br>(46.39)  | 96.3 (44.7-<br>208.8)    | 192<br>(40.68)  | 83.8 (39.1-<br>161.0)    | 85 (34.27)     | 80.0 (43.3-<br>191.6)    | 53 (26.37)     | 137.2 (65.9-<br>16.3)       |
| <b>Survived</b>            | 1391<br>(62.18) | 59.0 (24.0-<br>115.9)       | 398<br>(66.78)  | 57.3 (23.0-<br>116.5)       | 451<br>(62.64)  | 63.3 (24.0-<br>127.7)    | 294<br>(62.29)  | 57.0 (24.5-<br>101.1)    | 142<br>(57.26) | 59.3 (29.5-<br>103.7)    | 106<br>(52.74) | 51.4 (18.2-<br>96.6)        |
| <b>Died</b>                | 846<br>(37.82)  | 141.3 (75.4-<br>289.4)      | 198<br>(33.22)  | 136.2 (64.7-<br>296.0)      | 269<br>(37.36)  | 151.6 (85.6-<br>341.0)   | 178<br>(37.71)  | 135.9 (76.0-<br>243.2)   | 106<br>(42.74) | 148.4 (66.0-<br>291.5)   | 95 (47.26)     | 136.7 (65.8-<br>245.2)      |
| <b>D-dimer<br/>- mg/mL</b> | 6471            | 598.0<br>(304.0-<br>1715.0) | 1844<br>(28.5)  | 766.0<br>(365.5-<br>2371.5) | 2197<br>(33.95) | 565.0 (299.0-<br>1357.0) | 1286<br>(19.87) | 528.0 (279.0-<br>1333.0) | 624 (9.64)     | 523.5 (287.0-<br>1105.5) | 520 (8.04)     | 484.0<br>(261.0-<br>1079.0) |
| <b>Male</b>                | 3993<br>(61.71) | 569 (290-<br>1796)          | 1231<br>(66.76) | 730 (347-<br>2511)          | 1467<br>(66.77) | 546 (286-<br>1411)       | 744<br>(57.85)  | 488 (258-<br>1303)       | 310<br>(49.68) | 444 (243-977)            | 241<br>(46.35) | 488 (250-<br>1336)          |
| <b>Female</b>              | 2478<br>(38.29) | 647 (329-<br>1592)          | 613<br>(33.24)  | 792 (405-<br>2182)          | 730<br>(33.23)  | 610 (326-<br>1289)       | 542<br>(42.15)  | 626 (320-<br>1468)       | 314<br>(50.32) | 623 (320-<br>1252)       | 279<br>(53.65) | 481 (272-<br>1038)          |
| <b>Age &lt; 65</b>         | 3441<br>(53.18) | 462 (352-<br>1071)          | 739<br>(40.08)  | 568 (280-<br>1591)          | 1154<br>(52.53) | 446 (253-<br>1038)       | 780<br>(60.65)  | 426 (244-<br>1052)       | 398<br>(63.78) | 441 (250-902)            | 370<br>(71.15) | 426 (239-<br>935)           |
| <b>Age ≥ 65</b>            | 3030<br>(46.82) | 770 (406-<br>2378)          | 1105<br>(59.92) | 883 (448-<br>2846)          | 1043<br>(47.47) | 727 (394-<br>2092)       | 506<br>(39.35)  | 694 (379-<br>2222)       | 226<br>(36.22) | 710 (364-<br>2233)       | 150<br>(28.85) | 647 (371-<br>1702)          |
| <b>Survived</b>            | 4621<br>(71.41) | 507 (271-<br>1109)          | 1351<br>(73.26) | 643 (319-<br>1850)          | 1580<br>(71.92) | 497 (265-<br>1018)       | 926<br>(72.01)  | 442 (250-977)            | 427<br>(68.43) | 453 (252-951)            | 337<br>(64.81) | 427 (237-<br>872)           |
| <b>Died</b>                | 1850<br>(28.59) | 912 (449-<br>3395)          | 493<br>(26.74)  | 1204 (589-<br>3698)         | 617<br>(28.08)  | 911 (433-<br>3680)       | 360<br>(27.99)  | 913 (450-<br>3146)       | 197<br>(31.57) | 636 (397-<br>2616)       | 183<br>(35.19) | 678 (341-<br>2194)          |
| <b>N/L</b>                 | 8795            | 5.74 (3.40-<br>9.93)        | 2574<br>(29.27) | 6.37 (3.53-<br>11.33)       | 2963<br>(33.69) | 5.98 (3.53-<br>9.97)     | 1745<br>(19.84) | 5.35 (3.30-<br>8.99)     | 832 (9.46)     | 5.26 (3.21-<br>8.86)     | 681 (7.74)     | 4.77 (3.01-<br>7.81)        |
| <b>Male</b>                | 5218<br>(59.33) | 6.40 (3.77-<br>10.95)       | 1689<br>(65.62) | 7.11 (3.84-<br>12.27)       | 1910<br>(64.46) | 6.46 (3.83-<br>10.79)    | 943<br>(54.04)  | 6.08 (3.64-<br>10.29)    | 384<br>(46.15) | 5.82 (3.48-<br>10.19)    | 292<br>(42.88) | 5.45 (3.64-<br>8.57)        |
| <b>Female</b>              | 3577<br>(40.67) | 4.94 (3.02-<br>8.39)        | 885<br>(34.38)  | 5.43 (3.16-<br>9.68)        | 1053<br>(35.54) | 5.09 (3.09-<br>8.53)     | 802<br>(45.96)  | 4.61 (2.91-<br>7.34)     | 448<br>(53.85) | 4.89 (3.11-<br>7.71)     | 389<br>(57.12) | 4.29 (2.83-<br>7.38)        |
| <b>Age &lt; 65</b>         | 4839<br>(55.02) | 5.21 (3.12-<br>14.61)       | 1088<br>(42.27) | 5.58 (3.06-<br>10.07)       | 1630<br>(55.01) | 5.62 (3.37-<br>9.62)     | 1089<br>(62.41) | 5.05 (3.11-<br>8.40)     | 551<br>(66.23) | 4.80 (2.99-<br>7.86)     | 481<br>(70.63) | 4.45 (2.90-<br>7.24)        |
| <b>Age ≥ 65</b>            | 3956<br>(44.98) | 6.43 (3.79-<br>11.05)       | 1486<br>(57.73) | 7.04 (3.95-<br>12.09)       | 1333<br>(44.99) | 6.33 (3.78-<br>10.70)    | 656<br>(37.59)  | 5.91 (3.52-<br>9.96)     | 281<br>(33.77) | 6.26 (4.04-<br>10.73)    | 200<br>(29.37) | 5.63 (3.59-<br>9.44)        |
| <b>Survived</b>            | 6537<br>(74.33) | 5.14 (3.10-<br>8.75)        | 1933<br>(75.1)  | 5.49 (3.20-<br>9.93)        | 2221<br>(74.96) | 5.41 (3.25-<br>9.04)     | 1317<br>(75.47) | 4.86 (3.02-<br>7.90)     | 597<br>(71.75) | 4.75 (2.96-<br>7.60)     | 469<br>(68.87) | 4.30 (2.74-<br>6.57)        |
| <b>Died</b>                | 2258<br>(25.67) | 8.02 (4.83-<br>12.88)       | 641<br>(24.9)   | 9.55 (5.80-<br>16.00)       | 742<br>(25.04)  | 7.77 (4.95-<br>12.23)    | 428<br>(24.53)  | 7.77 (4.65-<br>11.80)    | 235<br>(28.25) | 7.38 (4.11-<br>12.19)    | 212<br>(31.13) | 6.23 (4.06-<br>10.12)       |
| <b>L/CRP</b>               | 3109            | 3.98 (1.07-<br>12.32)       | 896<br>(28.82)  | 4.64 (1.05-<br>16.17)       | 995 (32)        | 3.46 (0.91-<br>10.16)    | 613<br>(19.72)  | 4.11 (1.10-<br>12.81)    | 327<br>(10.52) | 3.14 (1.22-<br>13.75)    | 278 (8.94)     | 4.61 (1.69-<br>11.61)       |
| <b>Male</b>                | 1936<br>(62.27) | 3.27 (0.91-<br>10.09)       | 612<br>(68.3)   | 3.87 (0.88-<br>12.37)       | 666<br>(66.93)  | 2.89 (0.82-<br>8.01)     | 360<br>(58.73)  | 3.33 (0.89-<br>11.34)    | 173<br>(52.91) | 2.48 (1.02-<br>10.39)    | 125<br>(44.96) | 4.26 (1.43-<br>11.63)       |
| <b>Female</b>              | 1173<br>(37.73) | 5.40 (1.57-<br>17.03)       | 284<br>(31.7)   | 6.53 (1.89-<br>25.90)       | 329<br>(33.07)  | 4.99 (1.26-<br>16.73)    | 253<br>(41.27)  | 5.45 (1.76-<br>16.55)    | 154<br>(47.09) | 4.63 (1.39-<br>17.54)    | 153<br>(55.04) | 4.83 (2.09-<br>11.43)       |
| <b>Age &lt; 65</b>         | 1753<br>(56.38) | 3.98 (1.05-<br>13.01)       | 406<br>(45.31)  | 4.66 (0.95-<br>18.37)       | 552<br>(55.48)  | 3.45 (0.92-<br>10.82)    | 388<br>(63.3)   | 4.03 (0.98-<br>14.08)    | 216<br>(66.06) | 3.13 (1.22-<br>15.47)    | 191<br>(68.71) | 5.19 (1.77-<br>12.43)       |
| <b>Age ≥ 65</b>            | 1356<br>(43.62) | 3.98 (1.10-<br>11.38)       | 490<br>(54.69)  | 4.56 (1.19-<br>15.12)       | 443<br>(44.52)  | 3.46 (0.87-<br>9.70)     | 225<br>(36.7)   | 4.23 (1.28-<br>11.75)    | 111<br>(33.94) | 3.23 (1.21-<br>10.65)    | 87 (31.29)     | 3.98 (1.35-<br>8.80)        |
| <b>Survived</b>            | 2290<br>(73.66) | 4.77 (1.26-<br>16.17)       | 678<br>(75.67)  | 5.71 (1.36-<br>22.61)       | 747<br>(75.08)  | 4.19 (1.06-<br>13.20)    | 450<br>(73.41)  | 5.26 (1.38-<br>16.10)    | 229<br>(70.03) | 3.37 (1.17-<br>16.75)    | 186<br>(66.91) | 5.24 (1.84-<br>13.10)       |
| <b>Died</b>                | 819<br>(26.34)  | 2.73 (0.68-<br>6.50)        | 218<br>(24.33)  | 3.03 (0.55-<br>7.01)        | 248<br>(24.92)  | 2.50 (0.62-<br>5.21)     | 163<br>(26.59)  | 2.73 (0.67-<br>5.80)     | 98 (29.97)     | 2.44 (1.44-<br>6.50)     | 92 (33.09)     | 3.15 (0.87-<br>8.16)        |

**Notes:** (1) The first available laboratory values after presentation were taken into account in this analysis if within 24 hours from presentation, (2) BMI in kg/m<sup>2</sup>; **Abbreviations:** BMI = body mass index, IQR = interquartile range, no. = number, ng = nanogram, mg = milligram, L = liter, dL = deciliter, mL = milliliter, U = unit.

**Supplementary Table S2.** Baseline patient characteristics: Univariate and multivariate logistic regression analysis for the outcome of invasive mechanical ventilation after excluding patients that met the outcome of mortality

| Variable                       | Univariate analysis                  | Multivariate Analysis                              |                                                    |                                                    |                                                    |
|--------------------------------|--------------------------------------|----------------------------------------------------|----------------------------------------------------|----------------------------------------------------|----------------------------------------------------|
|                                |                                      | Model A<br>N = 6567<br>OR, 95% CI, <i>p</i> -value | Model B<br>N = 6567<br>OR, 95% CI, <i>p</i> -value | Model C<br>N = 6567<br>OR, 95% CI, <i>p</i> -value | Model D<br>N = 6567<br>OR, 95% CI, <i>p</i> -value |
| <b>Male sex</b>                | 1.512 (1.303-1.756) <i>p</i> <0.001  | 1.407 (1.082-1.829) <i>p</i> = 0.011               | 1.392 (1.072-1.808) <i>p</i> = 0.013               | 1.382 (1.065-1.793) <i>p</i> = 0.015               | 1.395 (1.076-1.809) <i>p</i> = 0.012               |
| <b>Age (All)</b>               | 1.005 (1.001-1.009) <i>p</i> = 0.009 |                                                    |                                                    |                                                    |                                                    |
| <50                            | 1.033 (1.012-1.055) <i>p</i> = 0.002 | *                                                  | *                                                  | *                                                  | *                                                  |
| 50-64                          | 1.001 (0.973-1.031) <i>p</i> = 0.934 | 1.345 (0.982-1.840) <i>p</i> = 0.065               | 1.322 (0.966-1.809) <i>p</i> = 0.081               | 1.320 (0.965-1.806) <i>p</i> = 0.082               | 1.340 (0.979-1.834) <i>p</i> = 0.067               |
| 65-74                          | 1.047 (0.996-1.101) <i>p</i> = 0.069 | 1.645 (1.144-2.366) <i>p</i> = 0.007               | 1.597 (1.111-2.294) <i>p</i> = 0.011               | 1.588 (1.106-2.280) <i>p</i> = 0.012               | 1.622 (1.130-2.330) <i>p</i> = 0.009               |
| ≥75                            | 0.959 (0.932-0.986) <i>p</i> = 0.003 | 0.773 (0.481-1.241) <i>p</i> = 0.286               | 0.738 (0.461-1.182) <i>p</i> = 0.207               | 0.728 (0.456-1.164) <i>p</i> = 0.185               | 0.751 (0.470-1.198) <i>p</i> = 0.229               |
| <b>Ethnicity/Race</b>          |                                      |                                                    |                                                    |                                                    |                                                    |
| Hispanic/Latino                | 1.329 (1.017-1.736) <i>p</i> = 0.037 | 1.216 0.759 1.947) <i>p</i> = 0.417                | 1.208 (0.755-1.934) <i>p</i> = 0.431               | 1.209 (0.755-1.935) <i>p</i> = 0.429               | 1.226 (0.766-1.963) <i>p</i> = 0.396               |
| Non-Hispanic Black             | 0.842 (0.633-1.120) <i>p</i> = 0.237 | 0.713 (0.432-1.175) <i>p</i> = 0.184               | 0.718 (0.436-1.183) <i>p</i> = 0.193               | 0.716 (0.435-1.180) <i>p</i> = 0.190               | 0.714 (0.433-1.176) <i>p</i> = 0.186               |
| Non-Hispanic White             | *                                    | *                                                  | *                                                  | *                                                  | *                                                  |
| Asian                          | 1.829 (1.275-2.622) <i>p</i> = 0.001 | 0.839 (0.397-1.775) <i>p</i> = 0.647               | 0.813 (0.385-1.716) <i>p</i> = 0.587               | 0.799 (0.379-1.686) <i>p</i> = 0.557               | 0.820 (0.389-1.730) <i>p</i> = 0.602               |
| Other/Unknown                  | 1.474 (1.100-1.976) <i>p</i> = 0.009 | 1.044 (0.617-1.767) <i>p</i> = 0.872               | 1.042 (0.616-1.763) <i>p</i> = 0.877               | 1.040 (0.615-1.759) <i>p</i> = 0.882               | 1.048 (0.620-1.772) <i>p</i> = 0.861               |
| <b>BMI &lt; 25 (reference)</b> | 0.703 (0.596-0.828) <i>p</i> <0.001  | *                                                  |                                                    |                                                    |                                                    |
| 25 ≤ BMI < 30                  | 1.036 (0.894-1.201) <i>p</i> = 0.636 | 1.174 (0.857-1.608) <i>p</i> = 0.318               |                                                    |                                                    |                                                    |
| 30 ≤ BMI < 35                  | 1.008 (0.846-1.201) <i>p</i> = 0.926 | 1.236 (0.863-1.769) <i>p</i> = 0.247               |                                                    |                                                    |                                                    |
| 35 ≤ BMI < 40                  | 1.167 (0.929-1.465) <i>p</i> = 0.185 | 0.996 (0.605-1.640) <i>p</i> = 0.987               |                                                    |                                                    |                                                    |
| BMI ≥ 30                       | 1.289 (1.119-1.486) <i>p</i> <0.001  |                                                    | 1.161 (0.899-1.498) <i>p</i> = 0.252               |                                                    |                                                    |
| BMI ≥ 35                       | 1.461 (1.233-1.731) <i>p</i> <0.001  |                                                    |                                                    | 1.173 (0.849-1.621) <i>p</i> = 0.333               |                                                    |
| BMI ≥ 40                       | 1.707 (1.367-2.132) <i>p</i> <0.001  | 1.824 (1.143-2.911) <i>p</i> = 0.012               |                                                    |                                                    | 1.629 (1.078-2.463) <i>p</i> = 0.021               |
| <b>Hypertension</b>            | 0.971 (0.844-1.117) <i>p</i> = 0.681 | 1.373 (0.987-1.910) <i>p</i> = 0.060               | 1.403 (1.010-1.950) <i>p</i> = 0.044               | 1.405 (1.011-1.952) <i>p</i> = 0.043               | 1.385 (0.997-1.924) <i>p</i> = 0.052               |
| <b>Hyperlipidemia</b>          | 0.884 (0.747-1.047) <i>p</i> = 0.154 | 0.754 (0.544-1.045) <i>p</i> = 0.090               | 0.746 (0.539-1.033) <i>p</i> = 0.078               | 0.748 (0.540-1.036) <i>p</i> = 0.081               | 0.756 (0.546-1.047) <i>p</i> = 0.092               |
| <b>Diabetes</b>                | 0.851 (0.727-0.997) <i>p</i> = 0.046 | 0.941 (0.663-1.336) <i>p</i> = 0.734               | 0.936 (0.660-1.327) <i>p</i> = 0.710               | 0.935 (0.659-1.325) <i>p</i> = 0.705               | 0.930 (0.656-1.319) <i>p</i> = 0.684               |
| <b>Heart failure</b>           | 0.760 (0.577-1.001) <i>p</i> = 0.051 | 0.900 (0.529-1.531) <i>p</i> = 0.697               | 0.909 (0.535-1.546) <i>p</i> = 0.725               | 0.906 (0.533-1.541) <i>p</i> = 0.717               | 0.893 (0.525-1.519) <i>p</i> = 0.676               |
| CAD                            | 0.707 (0.536-0.933) <i>p</i> = 0.014 | 0.463 (0.244-0.878) <i>p</i> = 0.018               | 0.464 (0.244-0.880) <i>p</i> = 0.019               | 0.464 (0.245-0.881) <i>p</i> = 0.019               | 0.466 (0.246-0.884) <i>p</i> = 0.020               |
| PAD                            | 0.681 (0.401-1.156) <i>p</i> = 0.155 | 1.215 (0.514-2.870) <i>p</i> = 0.658               | 1.207 (0.511-2.849) <i>p</i> = 0.668               | 1.202 (0.509-2.837) <i>p</i> = 0.675               | 1.207 (0.511-2.851) <i>p</i> = 0.669               |
| Afib                           | 0.764 (0.553-1.056) <i>p</i> = 0.103 | 0.894 (0.469-1.704) <i>p</i> = 0.733               | 0.896 (0.470-1.706) <i>p</i> = 0.738               | 0.898 (0.472-1.711) <i>p</i> = 0.744               | 0.897 (0.471-1.709) <i>p</i> = 0.742               |
| <b>Stroke</b>                  | 1.111 (0.962-1.282) <i>p</i> = 0.153 | 0.577 (0.430-0.776) <i>p</i> <0.001                | 0.582 (0.433-0.781) <i>p</i> = <0.001              | 0.582 (0.433-0.782) <i>p</i> <0.001                | 0.581 (0.432-0.781) <i>p</i> <0.001                |

|                 |                                      |                                      |                                      |                                      |                                      |
|-----------------|--------------------------------------|--------------------------------------|--------------------------------------|--------------------------------------|--------------------------------------|
| CKD             | 0.943 (0.757-1.173) <i>p</i> = 0.597 | 1.069 (0.709-1.612) <i>p</i> = 0.750 | 1.054 (0.699-1.589) <i>p</i> = 0.801 | 1.046 (0.694-1.576) <i>p</i> = 0.830 | 1.056 (0.701-1.592) <i>p</i> = 0.794 |
| COPD            | 0.853 (0.444-1.636) <i>p</i> = 0.632 | 1.045 (0.369-2.961) <i>p</i> = 0.935 | 1.010 (0.357-2.861) <i>p</i> = 0.985 | 1.007 (0.355-2.861) <i>p</i> = 0.990 | 1.021 (0.361-2.892) <i>p</i> = 0.968 |
| Asthma          | 0.934 (0.739-1.182) <i>p</i> = 0.571 | 0.884 (0.580-1.346) <i>p</i> = 0.565 | 0.916 (0.604-1.390) <i>p</i> = 0.681 | 0.914 (0.602-1.389) <i>p</i> = 0.674 | 0.882 (0.580-1.342) <i>p</i> = 0.558 |
| HIV/AIDS        | 1.172 (0.762-1.803) <i>p</i> = 0.471 | 1.443 (0.774-2.798) <i>p</i> = 0.278 | 1.414 (0.730-2.739) <i>p</i> = 0.305 | 1.414 (0.730-2.739) <i>p</i> = 0.305 | 1.418 (0.732-2.746) <i>p</i> = 0.301 |
| Liver cirrhosis | 0.789 (0.425-1.467) <i>p</i> = 0.454 | 0.322 (0.078-1.322) <i>p</i> = 0.116 | 0.318 (0.077-1.306) <i>p</i> = 0.112 | 0.318 (0.077-1.306) <i>p</i> = 0.112 | 0.322 (0.078-1.324) <i>p</i> = 0.116 |

**Notes:** (1) BMI in kg/m<sup>2</sup>, (2) age in years, (3) Model A includes the variables that were found to have significant univariate association and BMI as ordinal variable: BMI < 25, 25 ≤ BMI < 30, 30 ≤ BMI < 35, 35 ≤ BMI < 40, and BMI ≥ 40, (4) Model B includes the variables that were found to have significant univariate association and BMI as dichotomous variable: BMI < 30 and BMI ≥ 30, (5) Model C includes the variables that were found to have significant univariate association and BMI as dichotomous variable: BMI < 35 and BMI ≥ 35, (6) Model D includes the variables that were found to have significant univariate association and BMI as dichotomous variable: BMI < 40 and BMI ≥ 40.

**Abbreviations:** BMI = body mass index, OR = odds ratio, CI = confidence interval, kg = kilogram, m = meter, CAD = coronary artery disease, PAD = peripheral artery disease, Afib = atrial fibrillation, CKD = chronic kidney disease, COPD = chronic obstructive pulmonary disease, HIV = human immunodeficiency, AIDS = acquired immunodeficiency syndrome.

**Supplementary Table S3.** Baseline patient characteristics: Univariate and multivariate logistic regression analysis for the outcome of admission to the intensive care unit after excluding patients that met the outcome of mortality

| Variable             | Univariate analysis                  | Multivariate Analysis                |                                      |                                      |                                      |
|----------------------|--------------------------------------|--------------------------------------|--------------------------------------|--------------------------------------|--------------------------------------|
|                      |                                      | Model A<br>N = 6567                  | Model B<br>N = 6567                  | Model C<br>N = 6567                  | Model D<br>N = 6567                  |
|                      | OR, 95% CI, <i>p</i> -value          |
| Male sex             | 1.672 (1.497-1.867) <i>p</i> <0.001  | 1.461 (1.247-1.713) <i>p</i> <0.001  | 1.456 (1.243-1.706) <i>p</i> <0.001  | 1.464 (1.250-1.714) <i>p</i> <0.001  | 1.451 (1.240-1.698) <i>p</i> <0.001  |
| Age (All)            | 0.998 (0.995-1.001) <i>p</i> = 0.248 |                                      |                                      |                                      |                                      |
| <50                  | 1.037 (1.023-1.052) <i>p</i> <0.001  | *                                    | *                                    | *                                    | *                                    |
| 50-64                | 1.007 (0.986-1.029) <i>p</i> = 0.503 | 1.175 (0.973-1.419) <i>p</i> = 0.095 | 1.169 (0.968-1.411) <i>p</i> = 0.105 | 1.173 (0.971-1.416) <i>p</i> = 0.098 | 1.175 (0.973-1.419) <i>p</i> = 0.094 |
| 65-74                | 1.001 (0.964-1.040) <i>p</i> = 0.950 | 0.972 (0.771-1.225) <i>p</i> = 0.808 | 0.968 (0.769-1.219) <i>p</i> = 0.785 | 0.975 (0.775-1.227) <i>p</i> = 0.830 | 0.973 (0.773-1.225) <i>p</i> = 0.818 |
| ≥75                  | 0.941 (0.920-0.963) <i>p</i> <0.001  | 0.616 (0.469-0.808) <i>p</i> <0.001  | 0.614 (0.469-0.804) <i>p</i> <0.001  | 0.622 (0.475-0.814) <i>p</i> <0.001  | 0.616 (0.471-0.805) <i>p</i> <0.001  |
| Ethnicity/Race       |                                      |                                      |                                      |                                      |                                      |
| Hispanic/Latino      | 1.127 (0.929-1.367) <i>p</i> = 0.225 | 0.095 (0.684-1.197) <i>p</i> = 0.484 | 0.893 (0.676-1.181) <i>p</i> = 0.429 | 0.896 (0.678-1.185) <i>p</i> = 0.441 | 0.901 (0.681-1.191) <i>p</i> = 0.462 |
| Non-Hispanic Black   | 0.896 (0.733-1.096) <i>p</i> = 0.286 | 0.712 (0.532-0.953) <i>p</i> = 0.022 | 0.714 (0.534-0.956) <i>p</i> = 0.024 | 0.710 (0.531-0.950) <i>p</i> = 0.021 | 0.714 (0.533-0.955) <i>p</i> = 0.023 |
| Non-Hispanic White   | *                                    | *                                    | *                                    | *                                    | *                                    |
| Asian                | 1.902 (1.456-2.484) <i>p</i> <0.001  | 1.698 (1.164-2.475) <i>p</i> = 0.006 | 1.691 (1.161-2.464) <i>p</i> = 0.006 | 1.696 (1.165-2.470) <i>p</i> = 0.006 | 1.690 (1.161-2.460) <i>p</i> = 0.006 |
| Other/Unknown        | 1.384 (1.119-1.712) <i>p</i> = 0.003 | 1.025 (0.752-1.396) <i>p</i> = 0.877 | 1.019 (0.748-1.389) <i>p</i> = 0.903 | 1.020 (0.749-1.389) <i>p</i> = 0.902 | 1.021 (0.750-1.391) <i>p</i> = 0.894 |
| BMI < 25 (reference) | 0.746 (0.662-0.840) <i>p</i> <0.001  | *                                    |                                      |                                      |                                      |
| 25 ≤ BMI < 30        | 0.922 (0.826-1.030) <i>p</i> = 0.151 | 0.903 (0.749-1.088) <i>p</i> = 0.281 |                                      |                                      |                                      |
| 30 ≤ BMI < 35        | 1.139 (1.003-1.294) <i>p</i> = 0.044 | 0.949 (0.764-1.179) <i>p</i> = 0.637 |                                      |                                      |                                      |

|                         |                                         |                                         |                                         |                                         |                                         |
|-------------------------|-----------------------------------------|-----------------------------------------|-----------------------------------------|-----------------------------------------|-----------------------------------------|
| <b>35 ≤ BMI &lt; 40</b> | 1.296 (1.096-1.532) <i>p</i><br>= 0.002 | 1.100 (0.834-1.451) <i>p</i><br>= 0.501 |                                         |                                         |                                         |
| <b>BMI ≥ 30</b>         | 1.378 (1.240-1.531) <i>p</i><br><0.001  |                                         | 1.093 (0.934-1.279) <i>p</i><br>= 0.269 |                                         |                                         |
| <b>BMI ≥ 35</b>         | 1.438 (1.263-1.636) <i>p</i><br><0.001  |                                         |                                         | 1.219 (0.999-1.487) <i>p</i><br>= 0.051 |                                         |
| <b>BMI ≥ 40</b>         | 1.496 (1.253-1.787) <i>p</i><br><0.001  | 1.226 (0.905-1.662) <i>p</i><br>= 0.189 |                                         |                                         | 1.270 (0.971-1.678) <i>p</i><br>= 0.092 |
| <b>Hypertension</b>     | 0.967 (0.872-1.073) <i>p</i><br>= 0.531 | 1.143 (0.939-1.390) <i>p</i><br>= 0.182 | 1.146 (0.943-1.394) <i>p</i><br>= 0.172 | 1.138 (0.936-1.384) <i>p</i><br>= 0.195 | 1.142 (0.939-1.389) <i>p</i><br>= 0.182 |
| <b>Hyperlipidemia</b>   | 0.926 (0.818-1.047) <i>p</i><br>= 0.219 | 0.894 (0.738-1.083) <i>p</i><br>= 0.251 | 0.890 (0.735-1.078) <i>p</i><br>= 0.234 | 0.890 (0.735-1.077) <i>p</i><br>= 0.231 | 0.896 (0.739-1.084) <i>p</i><br>= 0.259 |
| <b>Diabetes</b>         | 0.931 (0.827-1.049) <i>p</i><br>= 0.242 | 1.255 (1.014-1.554) <i>p</i><br>= 0.036 | 1.267 (1.024-1.567) <i>p</i><br>= 0.029 | 1.266 (1.024-1.566) <i>p</i><br>= 0.030 | 1.263 (1.021-1.562) <i>p</i><br>= 0.032 |
| <b>Heart failure</b>    | 0.802 (0.659-0.976) <i>p</i><br>= 0.028 | 0.877 (0.650-1.185) <i>p</i><br>= 0.394 | 0.889 (0.658-1.199) <i>p</i><br>= 0.440 | 0.885 (0.655-1.194) <i>p</i><br>= 0.423 | 0.881 (0.653-1.190) <i>p</i><br>= 0.410 |
| <b>CAD</b>              | 0.939 (0.781-1.129) <i>p</i><br>= 0.503 | 1.041 (0.779-1.391) <i>p</i><br>= 0.786 | 1.029 (0.770-1.375) <i>p</i><br>= 0.846 | 1.036 (0.775-1.384) <i>p</i><br>= 0.812 | 1.030 (0.771-1.377) <i>p</i><br>= 0.351 |
| <b>PAD</b>              | 0.757 (0.525-1.092) <i>p</i><br>= 0.136 | 0.934 (0.560-1.558) <i>p</i><br>= 0.795 | 0.937 (0.562-1.561) <i>p</i><br>= 0.803 | 0.934 (0.560-1.557) <i>p</i><br>= 0.794 | 0.939 (0.564-1.566) <i>p</i><br>= 0.810 |
| <b>Afib</b>             | 1.271 (1.036-1.560) <i>p</i><br>= 0.022 | 1.710 (1.248-2.343) <i>p</i><br><0.001  | 1.712 (1.250-2.345) <i>p</i><br><0.001  | 1.704 (1.244-2.335) <i>p</i><br><0.001  | 1.714 (1.251-2.347) <i>p</i><br><0.001  |
| <b>Stroke</b>           | 0.804 (0.720-0.897) <i>p</i><br><0.001  | 0.529 (0.442-0.633) <i>p</i><br><0.001  | 0.527 (0.441-0.631) <i>p</i><br><0.001  | 0.527 (0.441-0.631) <i>p</i><br><0.001  | 0.527 (0.441-0.631) <i>p</i><br><0.001  |
| <b>CKD</b>              | 0.993 (0.846-1.164) <i>p</i><br>= 0.926 | 1.120 (0.880-1.424) <i>p</i><br>= 0.358 | 1.123 (0.883-1.428) <i>p</i><br>= 0.346 | 1.122 (0.882-1.427) <i>p</i><br>= 0.347 | 1.121 (0.882-1.426) <i>p</i><br>= 0.351 |
| <b>COPD</b>             | 0.710 (0.428-1.176) <i>p</i><br>= 0.183 | 0.798 (0.404-1.576) <i>p</i><br>= 0.516 | 0.804 (0.407-1.588) <i>p</i><br>= 0.530 | 0.807 (0.408-1.593) <i>p</i><br>= 0.536 | 0.807 (0.409-1.594) <i>p</i><br>= 0.538 |
| <b>Asthma</b>           | 0.792 (0.661-0.948) <i>p</i><br>= 0.011 | 0.784 (0.604-1.018) <i>p</i><br>= 0.068 | 0.801 (0.618-1.038) <i>p</i><br>= 0.093 | 0.788 (0.608-1.022) <i>p</i><br>= 0.073 | 0.790 (0.609-1.025) <i>p</i><br>= 0.076 |
| <b>HIV/AIDS</b>         | 1.027 (0.734-1.437) <i>p</i><br>= 0.876 | 1.179 (0.759-1.831) <i>p</i><br>= 0.463 | 1.192 (0.768-1.850) <i>p</i><br>= 0.434 | 1.196 (0.771-1.857) <i>p</i><br>= 0.424 | 1.188 (0.766-1.843) <i>p</i><br>= 0.442 |
| <b>Liver cirrhosis</b>  | 0.661 (0.410-1.064) <i>p</i><br>= 0.089 | 0.607 (0.321-1.149) <i>p</i><br>= 0.126 | 0.603 (0.319-1.141) <i>p</i><br>= 0.120 | 0.606 (0.320-1.145) <i>p</i><br>= 0.123 | 0.605 (0.320-1.145) <i>p</i><br>= 0.123 |

**Notes:** (1) BMI in kg/m<sup>2</sup>, (2) age in years, (3) Model A includes the variables that were found to have significant univariate association and BMI as ordinal variable: BMI < 25, 25 ≤ BMI < 30, 30 ≤ BMI < 35, 35 ≤ BMI < 40, and BMI ≥ 40, (4) Model B includes the variables that were found to have significant univariate association and BMI as dichotomous variable: BMI < 30 and BMI ≥ 30, (5) Model C includes the variables that were found to have significant univariate association and BMI as dichotomous variable: BMI < 35 and BMI ≥ 35, (6) Model D includes the variables that were found to have significant univariate association and BMI as dichotomous variable: BMI < 40 and BMI ≥ 40.

**Abbreviations:** BMI = body mass index, OR = odds ratio, CI = confidence interval, kg = kilogram, m = meter, CAD = coronary artery disease, PAD = peripheral artery disease, Afib = atrial fibrillation, CKD = chronic kidney disease, COPD = chronic obstructive pulmonary disease, HIV = human immunodeficiency, AIDS = acquired immunodeficiency syndrome.

**Supplementary Table S4.** Univariate association of timing of admission with mortality

| Quantile                         | All patients (N = 8833) |                     |         |
|----------------------------------|-------------------------|---------------------|---------|
|                                  | No.                     | OR, 95% CI          | p-Value |
| 1st quantile (3/3 - 3/23/2020)   | 883                     | *                   |         |
| 2nd quantile (3/23 - 3/27/2020)  | 883                     | 1.163 (0.945-1.431) | 0.154   |
| 3rd quantile (3/27 - 3/31/2020)  | 883                     | 1.355 (0.104-1.662) | 0.004   |
| 4th quantile (3/31 - 4/3/2020)   | 883                     | 1.418 (1.156-1.739) | <0.001  |
| 5th quantile (4/3 - 4/8/2020)    | 883                     | 1.668 (1.363-2.041) | <0.001  |
| 6th quantile (4/8 - 4/12/2020)   | 883                     | 1.307 (1.064-1.604) | 0.011   |
| 7th quantile (4/12 - 4/18/2020)  | 883                     | 1.071 (0.869-1.320) | 0.522   |
| 8th quantile (4/18 - 4/30/2020)  | 884                     | 0.731 (0.586-0.910) | 0.005   |
| 9th quantile (4/30 - 6/2/2020)   | 884                     | 0.254 (0.192-0.336) | <0.001  |
| 10th quantile (6/3 - 10/31/2020) | 884                     | 0.151 (0.108-0.210) | <0.001  |
| 1st quantile (3/3 - 3/29/2020)   | 2209                    | *                   |         |

|                                  |      |                     |        |
|----------------------------------|------|---------------------|--------|
| 2nd quartile (3/29 - 4/8/2020)   | 2208 | 1.335 (1.177-1.515) | <0.001 |
| 3rd quartile (4/8 - 4/23/2020)   | 2208 | 0.992 (0.871-1.129) | 0.902  |
| 4th quartile (4/23 - 10/31/2020) | 2208 | 0.241 (0.203-0.286) | <0.001 |

**Notes:** (1) N = 8833, (2) BMI in kg/m<sup>2</sup>; **Abbreviations:** BMI = body mass index, OR = odds ratio, CI = confidence interval, kg = kilogram, m = meter.

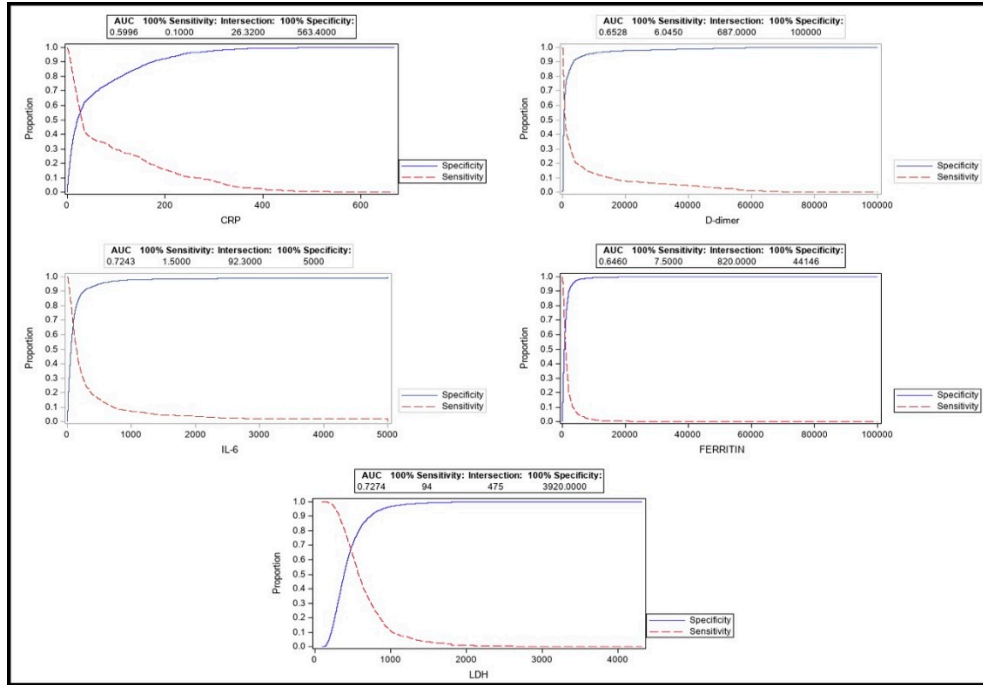

**Figure S1.** Inflammatory markers: Operating characteristics for mortality; **Notes:** LDH in U/L, ferritin in ng/mL, CRP in mg/dL, d-dimer in mg/mL, IL-6 in pg/mL.

**Abbreviations:** AUC = area under the curve, CRP = C-reactive protein, IL-6 = interleukin-6, LDH = lactic dehydrogenase

**Supplementary Table S5.** Inflammatory markers: Subgroup analysis based on BMI of the multivariate logistic regression analysis results for the outcome of mortality

| Panel A (N = 5068)                |                                      |                                      |                                      |                                      |                                      |
|-----------------------------------|--------------------------------------|--------------------------------------|--------------------------------------|--------------------------------------|--------------------------------------|
| Variable                          | Multivariate analysis                |                                      |                                      |                                      |                                      |
|                                   | BMI < 25<br>N = 1428 (28.18%)        | 25 ≤ BMI < 30<br>N = 1703 (33.60%)   | 30 ≤ BMI < 35<br>N = 1011 (19.95%)   | 35 ≤ BMI < 40<br>N = 516 (10.18%)    | BMI ≥ 40<br>N = 410 (8.09%)          |
|                                   | OR, 95% CI, <i>p</i> -value          |
| Age < 65                          | 0.322 (0.240-0.433) <i>p</i> <0.001  | 0.384 (0.302-0.489) <i>p</i> <0.001  | 0.409 (0.299-0.558) <i>p</i> <0.001  | 0.630 (0.414-0.960) <i>p</i> = 0.031 | 0.443 (0.270-0.726) <i>p</i> = 0.001 |
| Age ≥ 65                          | 3.102 (2.310-4.166) <i>p</i> <0.001  | 2.602 (2.047-3.307) <i>p</i> <0.001  | 2.446 (1.791-3.340) <i>p</i> <0.001  | 1.587 (1.042-2.417) <i>p</i> = 0.031 | 2.257 (1.377-3.698) <i>p</i> = 0.001 |
| Male sex                          | 1.008 (0.762-1.333) <i>p</i> = 0.955 | 1.292 (0.999-1.672) <i>p</i> = 0.051 | 1.534 (1.112-2.116) <i>p</i> = 0.009 | 1.211 (0.809-1.812) <i>p</i> = 0.353 | 1.087 (0.678-1.742) <i>p</i> = 0.728 |
| WBC -10 <sup>3</sup> /μL          | 1.782 (0.554-1.102) <i>p</i> = 0.160 | 0.856 (0.594-1.235) <i>p</i> = 0.407 | 0.780 (0.418-1.457) <i>p</i> = 0.436 | 0.688 (0.245-1.928) <i>p</i> = 0.477 | 1.501 (0.673-3.347) <i>p</i> = 0.321 |
| Neutrophils - 10 <sup>3</sup> /μL | 1.340 (0.934-1.922) <i>p</i> = 0.112 | 1.231 (0.844-1.795) <i>p</i> = 0.280 | 1.366 (0.714-2.615) <i>p</i> = 0.346 | 1.457 (0.507-4.185) <i>p</i> = 0.484 | 0.650 (0.284-1.488) <i>p</i> = 0.308 |
| Monocytes - 10 <sup>3</sup> /μL   | 0.999 (0.609-1.641) <i>p</i> = 0.998 | 0.523 (0.288-0.949) <i>p</i> = 0.033 | 0.795 (0.337-1.877) <i>p</i> = 0.600 | 1.124 (0.288-4.389) <i>p</i> = 0.866 | 0.492 (0.153-1.577) <i>p</i> = 0.233 |
| Lymphocytes - 10 <sup>3</sup> /μL | 1.255 (0.875-1.801) <i>p</i> = 0.217 | 1.203 (0.828-1.748) <i>p</i> = 0.332 | 1.331 (0.707-2.505) <i>p</i> = 0.376 | 1.504 (0.535-4.225) <i>p</i> = 0.439 | 0.497 (0.174-1.421) <i>p</i> = 0.192 |
| LDH per 100 U/L                   | 1.179 (1.124-1.238) <i>p</i> <0.001  | 1.239 (1.183-1.297) <i>p</i> <0.001  | 1.183 (1.118-1.251) <i>p</i> <0.001  | 1.239 (1.134-1.353) <i>p</i> <0.001  | 1.258 (1.143-1.385) <i>p</i> <0.001  |
| Ferritin per 200 ng/mL            | 1.014 (1.000-1.029) <i>p</i> = 0.051 | 1.005 (0.994-1.015) <i>p</i> = 0.378 | 1.014 (0.997-1.030) <i>p</i> = 0.099 | 0.997 (0.975-1.019) <i>p</i> = 0.773 | 1.037 (0.993-1.083) <i>p</i> = 0.099 |

| Panel B (N = 2461)                |                                                             |                                                                  |                                                                  |                                                                  |                                                            |
|-----------------------------------|-------------------------------------------------------------|------------------------------------------------------------------|------------------------------------------------------------------|------------------------------------------------------------------|------------------------------------------------------------|
| Variable                          | Multivariate analysis                                       |                                                                  |                                                                  |                                                                  |                                                            |
|                                   | BMI < 25<br>N = 696 (28.28%)<br>OR, 95% CI, <i>p</i> -value | 25 ≤ BMI < 30<br>N = 785 (31.90%)<br>OR, 95% CI, <i>p</i> -value | 30 ≤ BMI < 35<br>N = 490 (19.91%)<br>OR, 95% CI, <i>p</i> -value | 35 ≤ BMI < 40<br>N = 261 (10.81%)<br>OR, 95% CI, <i>p</i> -value | BMI ≥ 40<br>N = 224 (9.10%)<br>OR, 95% CI, <i>p</i> -value |
| Age < 65                          | 0.271 (0.175-0.419) <i>p</i> <0.001                         | 0.314 (0.217-0.456) <i>p</i> <0.001                              | 0.353 (0.220-0.566) <i>p</i> <0.001                              | 0.883 (0.476-1.638) <i>p</i> = 0.692                             | 0.400 (0.194-0.824) <i>p</i> = 0.013                       |
| Age ≥ 65                          | 3.696 (2.389-5.718) <i>p</i> <0.001                         | 3.182 (2.193-4.616) <i>p</i> <0.001                              | 2.836 (1.767-4.553) <i>p</i> <0.001                              | 1.133 (0.611-2.102) <i>p</i> = 0.692                             | 2.498 (1.213-5.142) <i>p</i> = 0.013                       |
| Male sex                          | 0.978 (0.637-1.500) <i>p</i> = 0.919                        | 1.107 (0.748-1.638) <i>p</i> = 0.612                             | 1.322 (0.807-2.167) <i>p</i> = 0.268                             | 1.033 (0.578-1.846) <i>p</i> = 0.914                             | 0.747 (0.381-1.464) <i>p</i> = 0.395                       |
| WBC -10 <sup>3</sup> /μL          | 0.716 (0.418-1.227) <i>p</i> = 0.224                        | 0.552 (1.308-1.992) <i>p</i> = 0.047                             | 0.524 (0.149-1.841) <i>p</i> = 0.314                             | 1.363 (0.373-4.988) <i>p</i> = 0.640                             | 1.851 (0.716-4.782) <i>p</i> = 0.204                       |
| Neutrophils - 10 <sup>3</sup> /μL | 1.445 (0.821-2.543) <i>p</i> = 0.203                        | 1.940 (1.063-3.540) <i>p</i> = 0.031                             | 2.021 (0.558-7.316) <i>p</i> = 0.284                             | 0.745 (0.197-2.811) <i>p</i> = 0.664                             | 0.550 (0.208-1.454) <i>p</i> = 0.228                       |
| Monocytes - 10 <sup>3</sup> /μL   | 1.405 (0.719-2.746) <i>p</i> = 0.320                        | 0.957 (0.381-2.406) <i>p</i> = 0.925                             | 1.686 (0.340-8.355) <i>p</i> = 0.522                             | 0.466 (0.077-2.813) <i>p</i> = 0.405                             | 0.141 (0.027-0.741) <i>p</i> = 0.021                       |
| Lymphocytes - 10 <sup>3</sup> /μL | 1.410 (0.812-2.451) <i>p</i> = 0.223                        | 1.864 (1.032-3.369) <i>p</i> = 0.039                             | 1.997 (0.564-7.068) <i>p</i> = 0.284                             | 0.342 (0.075-1.565) <i>p</i> = 0.167                             | 0.452 (0.144-1.417) <i>p</i> = 0.173                       |
| LDH per 100 U/L                   | 1.142 (1.068-1.220) <i>p</i> <0.001                         | 1.256 (1.168-1.351) <i>p</i> <0.001                              | 1.193 (1.100-1.294) <i>p</i> <0.001                              | 1.097 (0.978-1.231) <i>p</i> = 0.115                             | 1.251 (1.101-1.424) <i>p</i> <0.001                        |
| Ferritin per 200 ng/mL            | 1.015 (0.997-1.033) <i>p</i> = 0.105                        | 0.997 (0.984-1.011) <i>p</i> = 0.680                             | 1.046 (1.012-1.080) <i>p</i> = 0.007                             | 1.007 (0.973-1.043) <i>p</i> = 0.681                             | 1.049 (0.986-1.117) <i>p</i> = 0.130                       |
| Albumin - g/dL                    | 0.388 (0.275-0.547) <i>p</i> <0.001                         | 0.467 (0.324-0.672) <i>p</i> <0.001                              | 0.642 (0.403-1.021) <i>p</i> = 0.061                             | 0.687 (0.390-1.209) <i>p</i> = 0.193                             | 0.521 (0.268-1.013) <i>p</i> = 0.055                       |
| D-dimer per 200 mg/mL             | 1.004 (1.000-1.008) <i>p</i> = 0.038                        | 1.005 (1.000-1.010) <i>p</i> = 0.031                             | 1.008 (1.002-1.014) <i>p</i> = 0.007                             | 0.997 (0.989-1.006) <i>p</i> = 0.520                             | 0.997 (0.989-1.004) <i>p</i> = 0.381                       |
| CRP per 20 mg/dL                  | 1.079 (1.037-1.123) <i>p</i> <0.001                         | 1.037 (0.999-1.076) <i>p</i> = 0.056                             | 1.021 (0.975-1.068) <i>p</i> = 0.377                             | 0.947 (0.881-1.018) <i>p</i> = 0.139                             | 1.023 (0.951-1.100) <i>p</i> = 0.539                       |
| IL-6 per 20 pg/mL                 | *                                                           | *                                                                | *                                                                | *                                                                | *                                                          |
| Albumin - g/dL                    | 0.571 (0.456-0.714) <i>p</i> <0.001                         | 0.504 (0.400-0.634) <i>p</i> <0.001                              | 0.617 (0.453-0.842) <i>p</i> = 0.002                             | 0.619 (0.401-0.995) <i>p</i> = 0.030                             | 0.523 (0.316-0.867) <i>p</i> = 0.012                       |
| D-dimer per 200 mg/mL             | 1.003 (1.001-1.006) <i>p</i> = 0.017                        | 1.003 (1.000-1.005) <i>p</i> = 0.058                             | 1.005 (1.002-1.009) <i>p</i> = 0.004                             | 1.001 (0.997-1.005) <i>p</i> = 0.598                             | 1.003 (0.998-1.009) <i>p</i> = 0.189                       |
| CRP per 20 mg/dL                  | *                                                           | *                                                                | *                                                                | *                                                                | *                                                          |
| IL-6 per 20 pg/mL                 | *                                                           | *                                                                | *                                                                | *                                                                | *                                                          |
| Panel C (N = 665)                 |                                                             |                                                                  |                                                                  |                                                                  |                                                            |
| Variable                          | Multivariate analysis                                       |                                                                  |                                                                  |                                                                  |                                                            |
|                                   | BMI < 25<br>N = 164 (24.66%)<br>OR, 95% CI, <i>p</i> -value | 25 ≤ BMI < 30<br>N = 204 (30.68%)<br>OR, 95% CI, <i>p</i> -value | 30 ≤ BMI < 35<br>N = 137 (20.60%)<br>OR, 95% CI, <i>p</i> -value | 35 ≤ BMI < 40<br>N = 78 (11.73%)<br>OR, 95% CI, <i>p</i> -value  | BMI ≥ 40<br>N = 82 (12.33%)<br>OR, 95% CI, <i>p</i> -value |
| Age < 65                          | 0.565 (0.247-1.288) <i>p</i> = 0.174                        | 0.271 (0.136-0.542) <i>p</i> <0.001                              | 0.550 (0.225-1.343) <i>p</i> = 0.189                             | 1.118 (0.365-3.422) <i>p</i> = 0.845                             | 0.232 (0.066-0.807) <i>p</i> = 0.022                       |
| Age ≥ 65                          | 1.771 (0.777-4.040) <i>p</i> = 0.174                        | 3.684 (1.844-7.359) <i>p</i> <0.001                              | 1.819 (0.745-4.445) <i>p</i> = 0.189                             | 0.894 (0.292-2.737) <i>p</i> = 0.845                             | 4.320 (1.240-15.052) <i>p</i> = 0.022                      |
| Male sex                          | 1.120 (0.458-2.741) <i>p</i> = 0.804                        | 0.948 (0.438-2.052) <i>p</i> = 0.892                             | 0.779 (0.319-1.901) <i>p</i> = 0.583                             | 1.151 (0.407-3.254) <i>p</i> = 0.791                             | 0.331 (0.089-1.226) <i>p</i> = 0.098                       |
| WBC -10 <sup>3</sup> /μL          | 1.646 (0.293-9.234) <i>p</i> = 0.571                        | 0.327 (0.053-2.030) <i>p</i> = 0.230                             | 0.861 (0.097-7.632) <i>p</i> = 0.893                             | 3.940 (0.154-100.864) <i>p</i> = 0.407                           | 3.871 (0.599-25.011) <i>p</i> = 0.155                      |
| Neutrophils - 10 <sup>3</sup> /μL | 0.607 (0.104-3.558) <i>p</i> = 0.580                        | 3.276 (0.509-21.106) <i>p</i> = 0.212                            | 1.203 (0.126-11.448) <i>p</i> = 0.872                            | 0.239 (0.008-6.946) <i>p</i> = 0.405                             | 0.242 (0.035-1.665) <i>p</i> = 0.149                       |
| Monocytes - 10 <sup>3</sup> /μL   | 0.817 (0.080-8.376) <i>p</i> = 0.865                        | 0.925 (0.163-22.754) <i>p</i> = 0.603                            | 3.080 (0.217-43.706) <i>p</i> = 0.406                            | 0.288 (0.009-9.734) <i>p</i> = 0.488                             | 0.117 (0.006-2.341) <i>p</i> = 0.160                       |

|                                      |                                         |                                          |                                          |                                         |                                         |
|--------------------------------------|-----------------------------------------|------------------------------------------|------------------------------------------|-----------------------------------------|-----------------------------------------|
| Lymphocytes -<br>10 <sup>3</sup> /μL | 0.574 (0.100-3.304) <i>p</i><br>= 0.534 | 1.795 (0.194-16.565) <i>p</i><br>= 0.606 | 1.238 (0.130-11.833) <i>p</i><br>= 0.853 | 0.201 (0.005-8.219) <i>p</i> =<br>0.397 | 0.076 (0.005-1.263) <i>p</i><br>= 0.072 |
| LDH per 100<br>U/L                   | 1.221 (1.021-1.460) <i>p</i><br>= 0.028 | 1.250 (1.087-1.437) <i>p</i><br>= 0.002  | 1.195 (0.994-1.436) <i>p</i><br>= 0.058  | 1.041 (0.868-1.248) <i>p</i> =<br>0.667 | 1.117 (0.898-1.388) <i>p</i><br>= 0.320 |
| Ferritin per 200<br>ng/mL            | 1.065 (1.014-1.119) <i>p</i><br>= 0.012 | 1.001 (0.968-1.034) <i>p</i><br>= 0.973  | 1.088 (1.004-1.178) <i>p</i><br>= 0.040  | 1.174 (0.999-1.378) <i>p</i> =<br>0.051 | 1.351 (1.016-1.797) <i>p</i><br>= 0.038 |
| Albumin - g/dL                       | 0.313 (0.134-0.731) <i>p</i><br>= 0.007 | 0.938 (0.477-1.845) <i>p</i><br>= 0.853  | 0.611 (0.275-1.361) <i>p</i><br>= 0.228  | 0.747 (0.260-2.144) <i>p</i> =<br>0.587 | 0.606 (0.184-1.994) <i>p</i><br>= 0.410 |
| D-dimer per 200<br>mg/mL             | 0.997 (0.989-1.006) <i>p</i><br>= 0.535 | 1.005 (0.998-1.013) <i>p</i><br>= 0.152  | 1.018 (1.000-1.036) <i>p</i><br>= 0.048  | 0.993 (0.977-1.009) <i>p</i> =<br>0.364 | 1.003 (0.994-1.013) <i>p</i><br>= 0.499 |
| CRP per 20<br>mg/dL                  | 0.990 (0.911-1.076) <i>p</i><br>= 0.811 | 1.022 (0.957-1.091) <i>p</i><br>= 0.524  | 1.046 (0.941-1.162) <i>p</i><br>= 0.407  | 0.956 (0.786-1.162) <i>p</i> =<br>0.650 | 1.022 (0.867-1.203) <i>p</i><br>= 0.798 |
| IL-6 per 20<br>pg/mL                 | 1.009 (0.996-1.022) <i>p</i><br>= 0.179 | 1.011 (0.998-1.024) <i>p</i><br>= 0.088  | 1.037 (0.992-1.085) <i>p</i><br>= 0.109  | 1.007 (0.974-1.040) <i>p</i> =<br>0.693 | 1.010 (0.987-1.034) <i>p</i><br>= 0.401 |

**Notes:** (1) BMI in kg/m<sup>2</sup>, (2) age in years, (3) Panel A refers to a cohort of 5068 patients that had available results for all these markers: WBC, neutrophils, monocytes, lymphocytes, LDH, ferritin, albumin, d-dimer, (4) Panel B refers to a cohort of 2461 patients that had available results for all the markers of Model A and CRP, (5) Panel C refers to a cohort of 665 patients that had available results for all the markers of Model B and IL-6.

**Abbreviations:** BMI = body mass index, g = gram, ng = nanogram, mg = milligram, L = liter, dL = deciliter, mL = milliliter, μL = microliter, U = unit, CRP = C-reactive protein, IL-6 = interleukin-6, LDH = lactic dehydrogenase.
